# Supplementary material for: Uncovering Immersive Competence as a Hidden Bias in VR-Based Clinical Assessment – A Randomized Controlled Study
Source: Research Square preprint supplement (doi:10.21203/rs.3.rs-7660457/v1), 2025-10-17
Supplement: Supplementary file 1 [file 3fac5239e54dc2297b5b1361.docx]

**Supplementary Table 1.** Specifications (content, time limits and target scores) for general and specific IC training.

| **General IC training (VR Competence App)** | | | |
| --- | --- | --- | --- |
| **Task No** | **Content** | **Time limit  (sec)** | **Target score  (75% of pilot cohort)** |
| 1 | Controller buttons | 60 | 60% |
| 2 | Orientation | 60 | 90% |
| 3 | Select items | 60 | 50% |
| 4 | Scale items | 60 | 60% |
| 5 | Touch user interfaces | 60 | 73% |
| 6 | Teleport | 60 | 70% |
| 7 | Rotate items | 60 | 60% |
| 8 | Raycast for user interfaces | 60 | 70% |
|  | | | |
| **Specific IC training (STEP-VR emergency simulation environment)** | | | |
| **Task No** | **Content** | **Time limit*  (sec)** |  |
| 1 | Intravenous cannulation | 9 |
| 2 | Measure SpO₂ | 11 |
| 3 | Draw blood | 16 |
| 4 | Administer oral medication | 11 |
| 5 | Administer intravenous medication | 13 |
| 6 | Request laboratory results | 16 |
| 7 | Apply external pacemaker | 18 |
|  | | |
| *The time limits were calibrated to correspond to the 75th percentile of the pilot cohort. | | | |

**Supplementary Table 2.** Candidate assessment form for actions that should be taken during the VR-based assessment for the scenario “Septic shock”.

| **Candidate assessment form for the station “septic shock”** | | | |
| --- | --- | --- | --- |
| **Item** | **Result** | | |
| **Monitoring/Diagnostics** | | | |
| 1 O2 monitoring attached | Yes |  | No |
| 2 Blood cultures taken before antibiotic therapy  *(partially met: only one pair or sample taken)* | Fully met | Partially met | Not met |
| 3 Arterial blood gas taken | Yes |  | No |
| 4 Point-of-care ultrasound performed | Yes |  | No |
| **Initial Therapy** | | | |
| 5 Rapid volume replacement initiated  *(partially met: flow rate too slow (<500ml/h) or only short IV infusion)* | Fully met | Partially met | Not met |
| 6 Catecholamines (norepinephrine) administered if MAP < 65 mmHg under/after fluid replacement  *(partially met: not primarily indicated catecholamine, e.g., adrenaline)* | Fully met | Partially met | Not met |
| 7 Empirical antibiotics administered (1st choice: piperacillin/tazobactam, Meropenem)  *(partially met: antibiotic therapy with a 2nd choice drug)* | Fully met | Partially met | Not met |
| **Further measures and recommendations** | | | |
| 8 Surgical consultation requested | Yes |  | no |
| 9 Intensive care unit transfer requested | Yes |  | no |

**Supplementary Table 3.** Responses to the open-ended question (“The following changes would be necessary for VR-based examinations to be used as a genuine assessment tool in medical education”) summarized using thematic analysis.

| **Theme** | **n** | **%** | **Example quote** |
| --- | --- | --- | --- |
| Need for extensive prior preparation with the VR environment | 71/91 | 78 | "I was frustrated that I was very slow, since I had no prior experience with VR… With regular use, this would certainly become easier" |
| … practically | 66/91 | 73 | "For examinations, one would need to become more familiar with the layout of the simulation environment" |
| ... theoretically | 23/91 | 25 | "I would have liked to prepare better and take notes beforehand" |
| … as part of the  curriculum | 16/91 | 18 | "In general, I think VR is very useful for practice… as a curricular training, for example as part of the 'emergency medicine weekend', I would find it really good" |
| Program-related improvements of accessiblity | 17/91 | 19 | "The grasping function was sometimes frustrating, otherwise very well implemented"; "Operation was generally easy, but for the medications in the drawer, slightly larger font would be helpful" |
| Adjustments of examination conditions | 11/91 | 12 | "I was a bit frustrated because I could not solve simple tasks due to time pressure" |

**Supplementary Data 1:** Anonymized datasets generated and analyzed in this study.
(external file: Schaaletal_Supplementary_Data_1.xlsx)
